# Supplementary material
Source: publisher figshare collection journal article supplement (https://tandf.figshare.com/ndownloader/files/18504719)
Supplement: Supplementary file 1 [file 18504719]

**Supporting information for**

**Matteuinterins A-C, three** new glucosides from the rhizomesof *Matteuccia intermedia*

Xue Lia, Li-Ting Niua, Wei-Tong Menga, Ling-Juan Zhua, Xue Zhanga, * and Xin-Sheng Yaoa, b, *

aSchool of Traditional Chinese Materia Medica, Key Laboratory of Structure-Based Drug Design & Discovery, Ministry of Education, Shenyang Pharmaceutical University, Shenyang 110016, China; bInstitute of Traditional Chinese Medicine & Natural Products, College of Pharmacy, Jinan University, Guangzhou 510632, China

**Contents**

Figure S1. 1H NMR spectrum of matteuinterin A (**1**) in CD3OD

Figure S2. 13C NMR spectrum of matteuinterin A (**1**) in CD3OD

Figure S3. HSQC spectrum of matteuinterin A (**1**) in CD3OD

Figure S4. HMBC spectrum of matteuinterin A (**1**) in CD3OD

Figure S5. COSY spectrum of matteuinterin A (**1**) in CD3OD

Figure S6. NOESY spectrum of matteuinterin A (**1**) in CD3OD

Figure S7. DEPT spectrum of matteuinterin A (**1**) in CD3OD

Figure S8. HRESIMS spectrum of matteuinterin A (**1**)

Figure S9. UV spectrum of matteuinterin A (**1**)

Figure S10. IR spectrum of matteuinterin A (**1**)

Figure S11. 1H NMR spectrum of **1a** in CD3OD

Figure S12. 13C NMR spectrum of **1a** in CD3OD

Figure S13. HSQC spectrum of **1a** in CD3OD

Figure S14. HMBC spectrum of **1a** in CD3OD

Figure S15. HRESIMS spectrum of **1a**

Figure S16. UV spectrum of **1a**

Figure S17. 1H NMR spectrum of matteuinterin B (**2**) in CD3OD

Figure S18. 13C NMR spectrum of matteuinterin B (**2**) in CD3OD

Figure S19. HSQC spectrum of matteuinterin B (**2**) in CD3OD

Figure S20. HMBC spectrum of matteuinterin B (**2**) in CD3OD

Figure S21. COSY spectrum of matteuinterin B (**2**) in CD3OD

Figure S22. DEPT spectrum of matteuinterin B (**2**) in CD3OD

Figure S23. HRESIMS spectrum of matteuinterin B (**2**)

Figure S24. UV spectrum of matteuinterin B (**2**)

Figure S25. IR spectrum of matteuinterin B (**2**)

Figure S26. 1H NMR spectrum of matteuinterin C (**3**) in CD3OD

Figure S27. 13C NMR spectrum of matteuinterin C (**3**) in CD3OD

Figure S28. HSQC spectrum of matteuinterin C (**3**) in CD3OD

Figure S29. HMBC spectrum of matteuinterin C (**3**) in CD3OD

Figure S30. COSY spectrum of matteuinterin C (**3**) in CD3OD

Figure S31. DEPT spectrum of matteuinterin C (**3**) in CD3OD

Figure S32. HRESIMS spectrum of matteuinterin C (**3**) in CD3OD

Figure S33. UV spectrum of matteuinterin C (**3**)

Figure S34. IR spectrum of matteuinterin C (**3**)

Scheme S1 Determination of the absolute configuration of HMG group in matteuinterins C (**2**).

Figure S35. 1H NMR spectra of compound **2C** in CD3Cl.


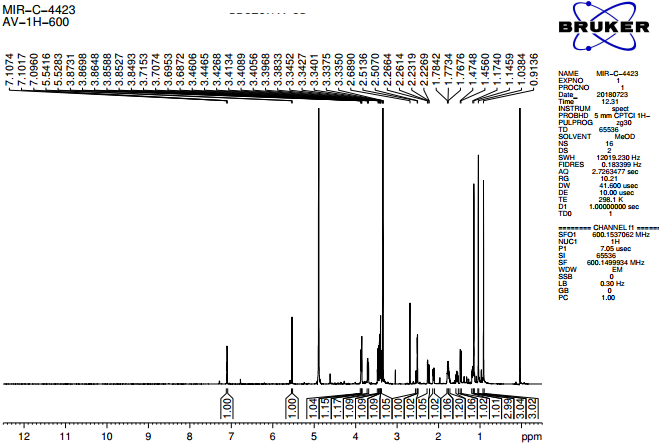


Figure S1. 1H NMR spectrum of matteuinterin A (**1**) in CD3OD


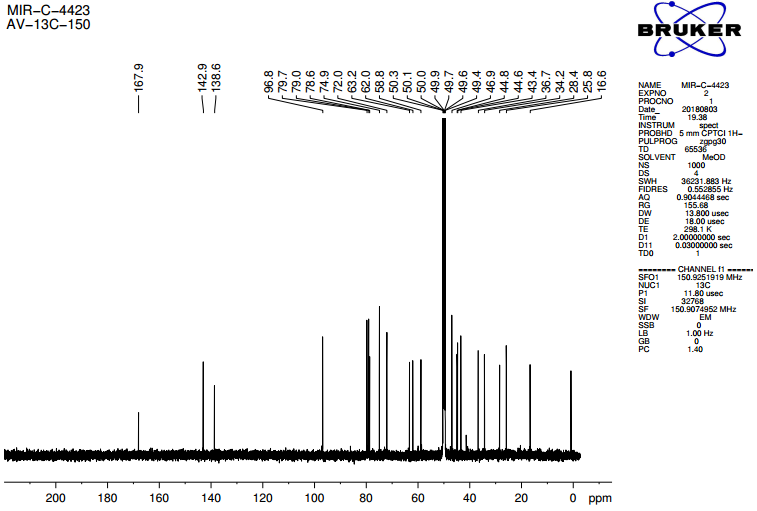


Figure S2. 13C NMR spectrum of matteuinterin A (**1**) in CD3OD


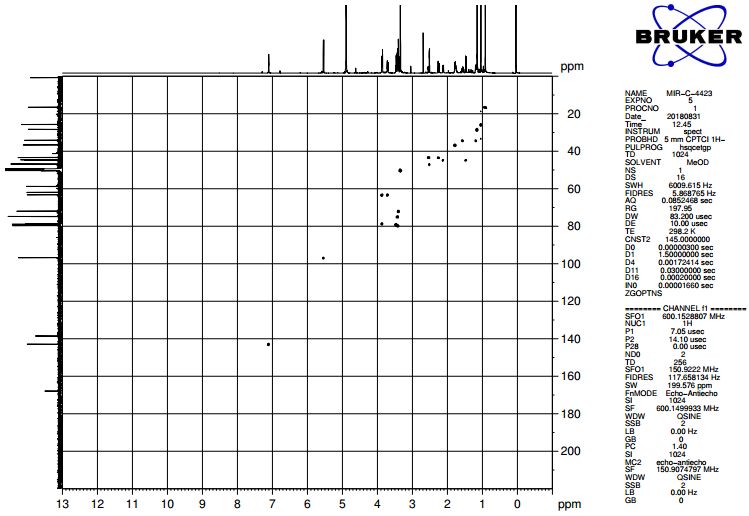


Figure S3. HSQC spectrum of matteuinterin A (**1**) in CD3OD


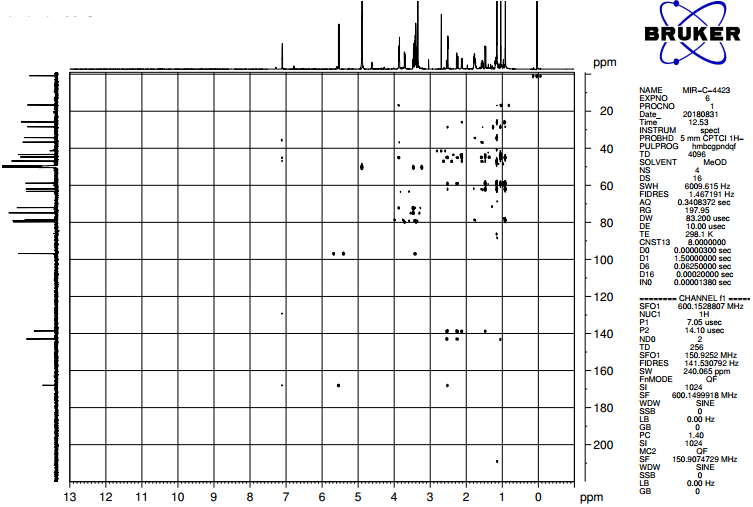


Figure S4. HMBC spectrum of matteuinterin A (**1**) in CD3OD


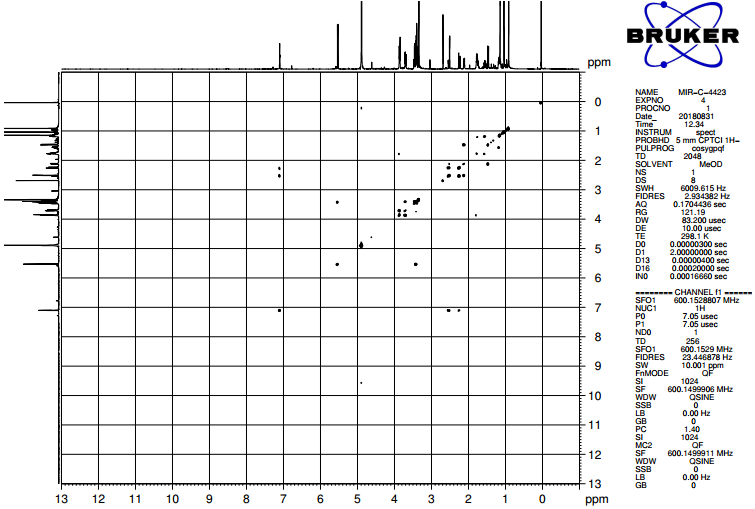


Figure S5. COSY spectrum of matteuinterin A (**1**) in CD3OD


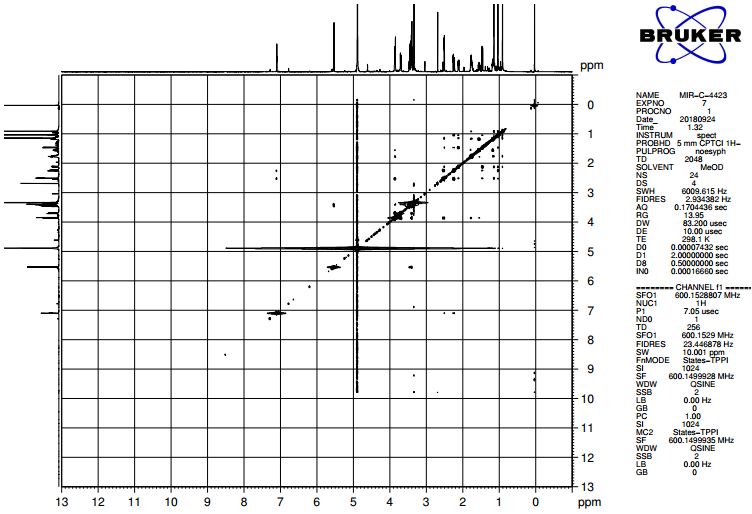


Figure S6. NOESY spectrum of matteuinterin A (**1**) in CD3OD


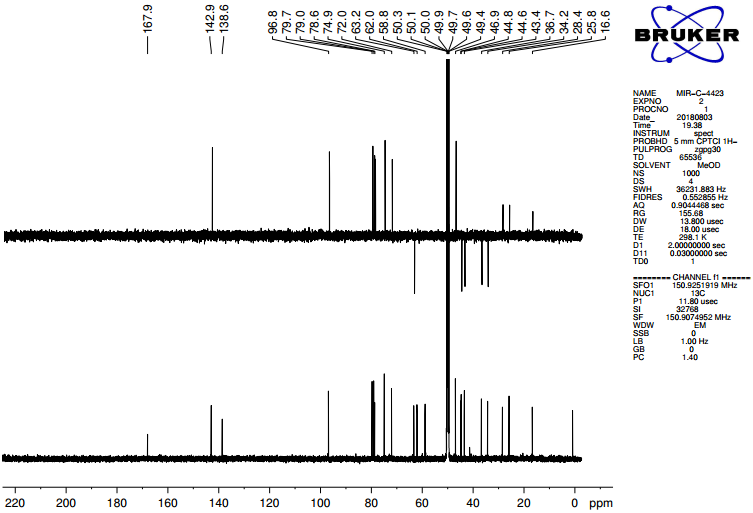


Figure S7. DEPT spectrum of matteuinterin A (**1**) in CD3OD


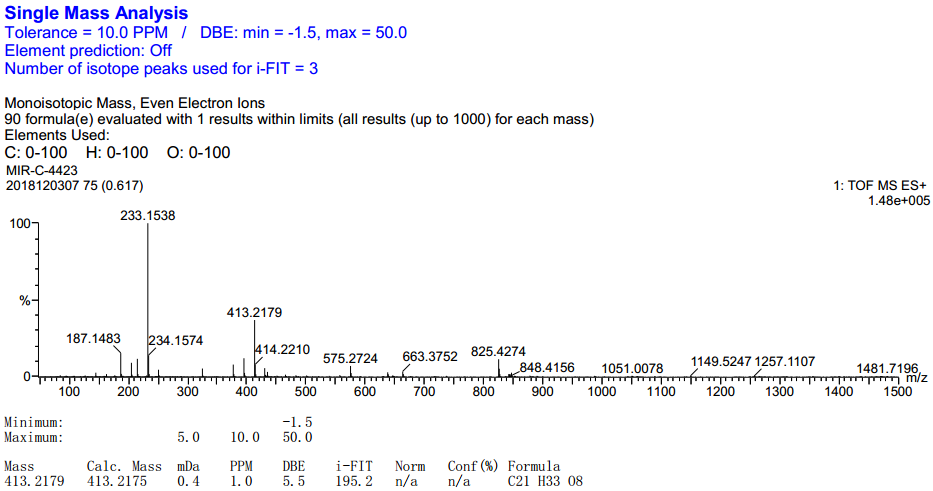


Figure S8. HRESIMS spectrum of matteuinterin A (**1**)


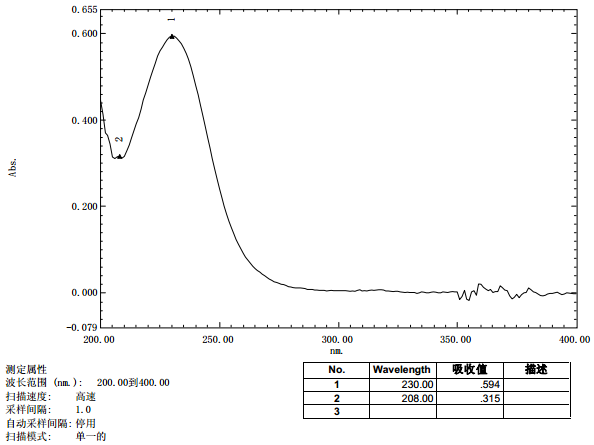


Figure S9. UV spectrum of matteuinterin A (**1**)


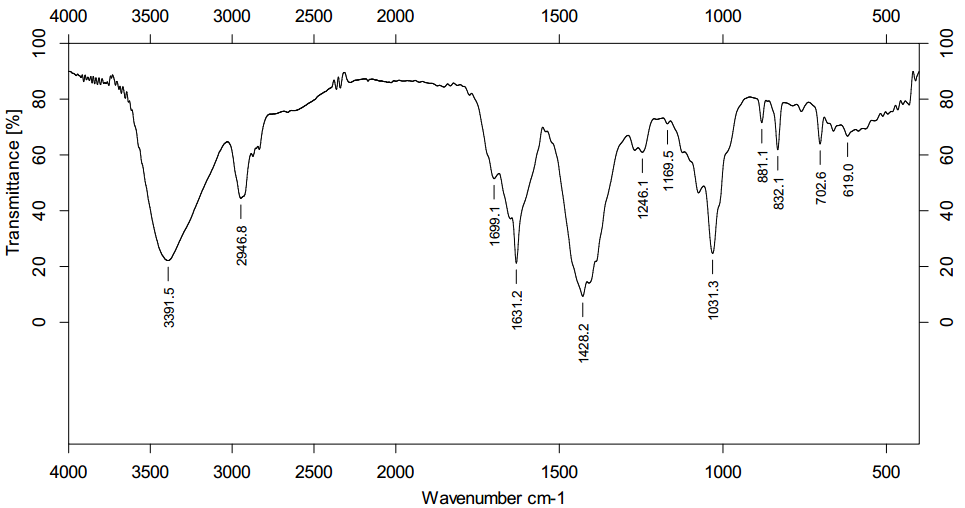


Figure S10. IR spectrum of matteuinterin A (**1**)


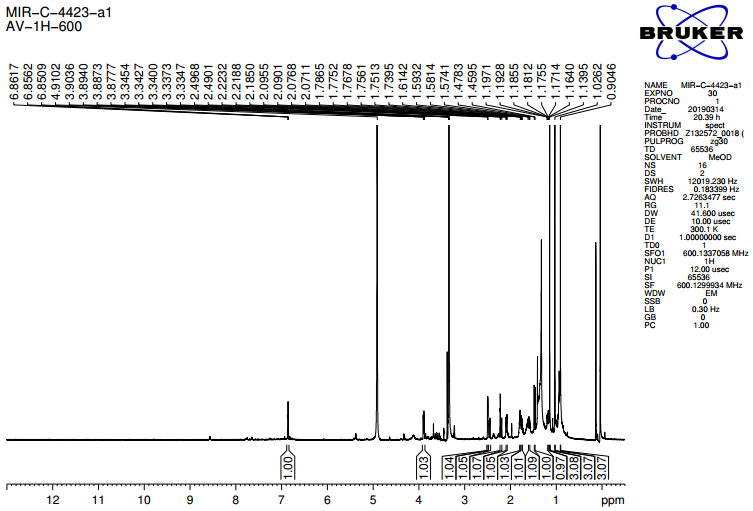


Figure S11. 1H NMR spectrum of **1a** in CD3OD


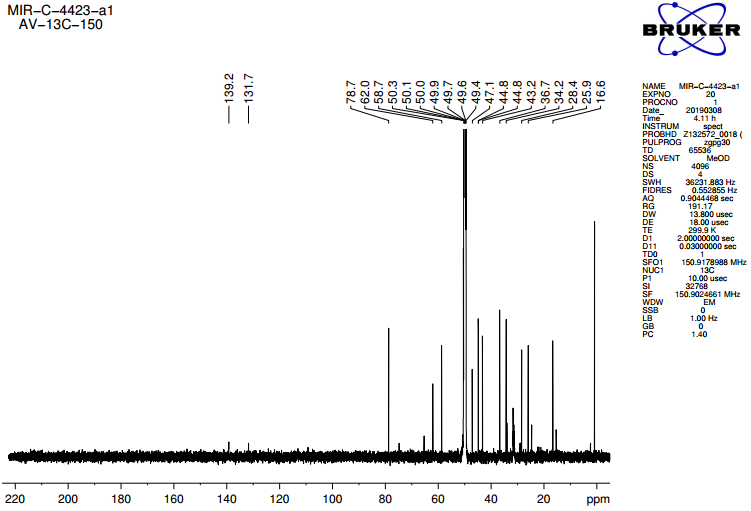


Figure S12. 13C NMR spectrum of **1a** in CD3OD


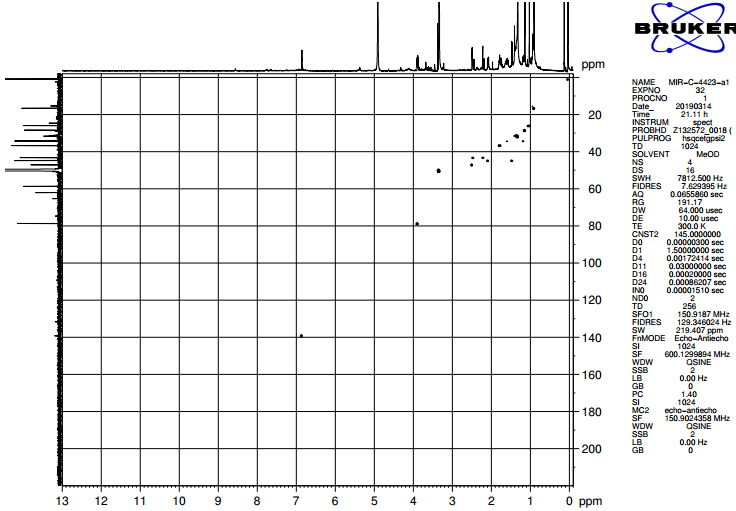


Figure S13. HSQC spectrum of **1a** in CD3OD


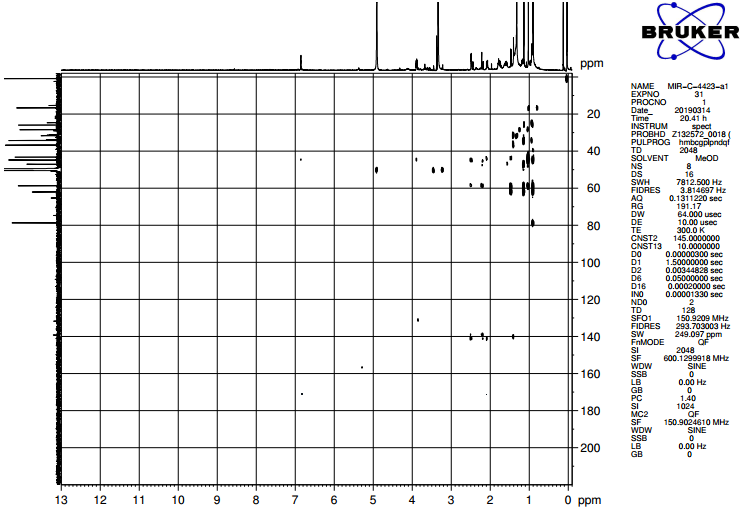


Figure S14. HMBC spectrum of **1a** in CD3OD


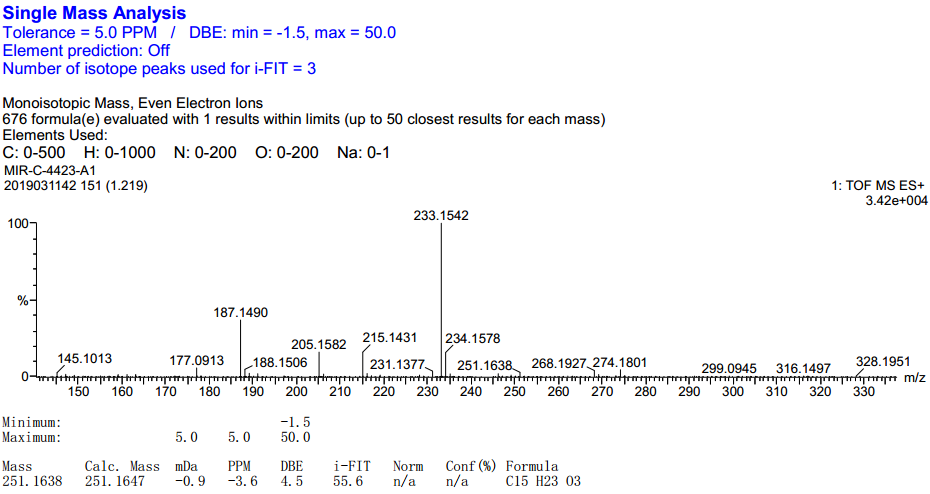


Figure S15. HRESIMS spectrum of **1a**


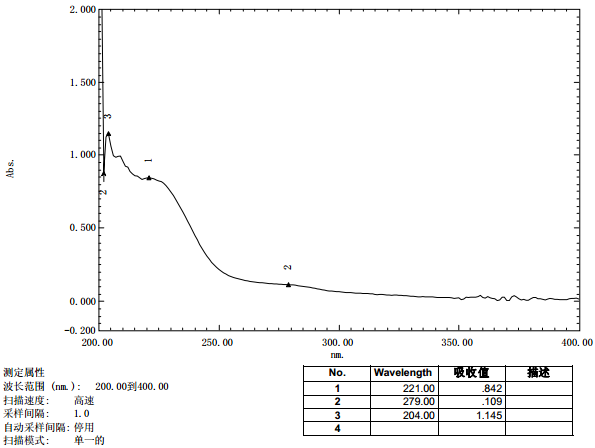


Figure S16. UV spectrum of **1a**


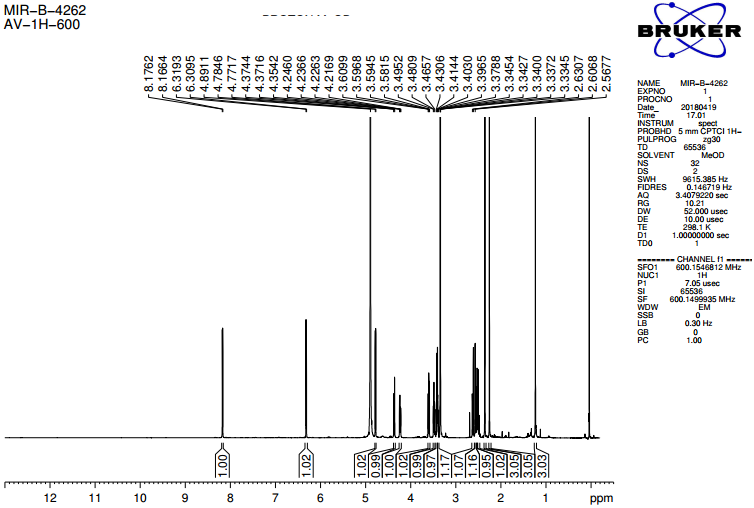


Figure S17. 1H NMR spectrum of matteuinterin B (**2**) in CD3OD


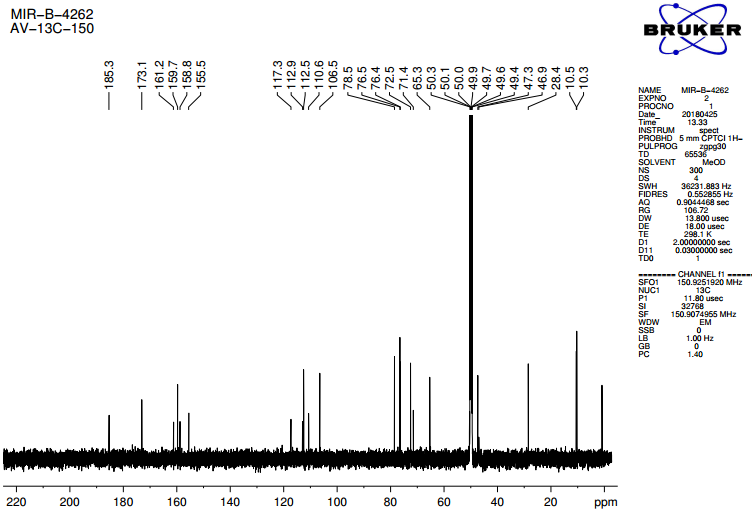


Figure S18. 13C NMR spectrum of matteuinterin B (**2**) in CD3OD


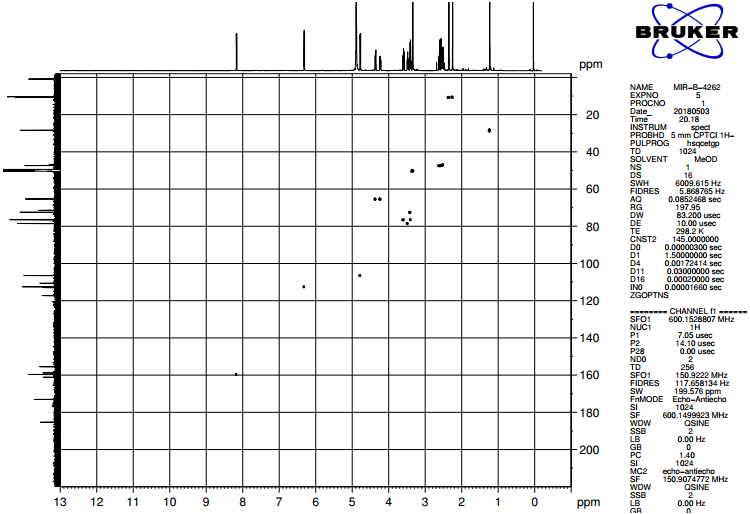
Figure S19. HSQC spectrum of matteuinterin B (**2**) in CD3OD


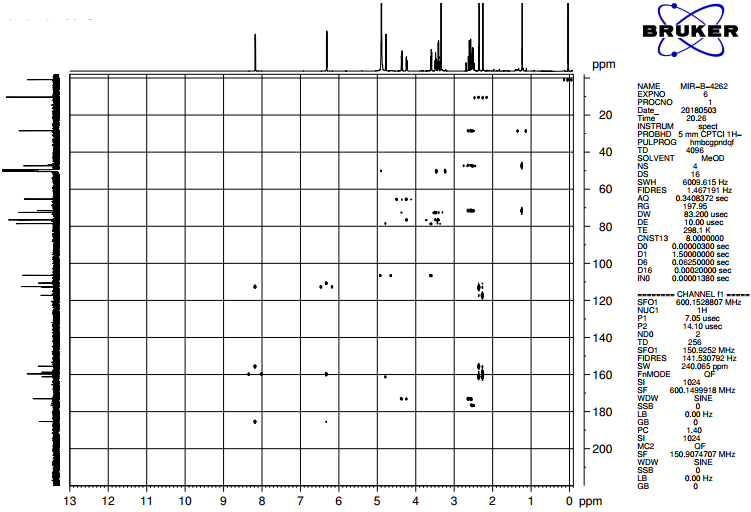
Figure S20. HMBC spectrum of matteuinterin B (**2**) in CD3OD


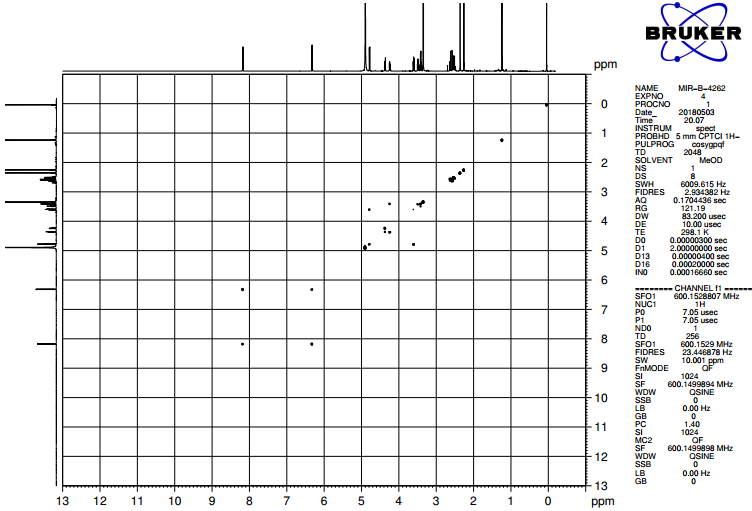
Figure S21. COSY spectrum of matteuinterin B (**2**) in CD3OD


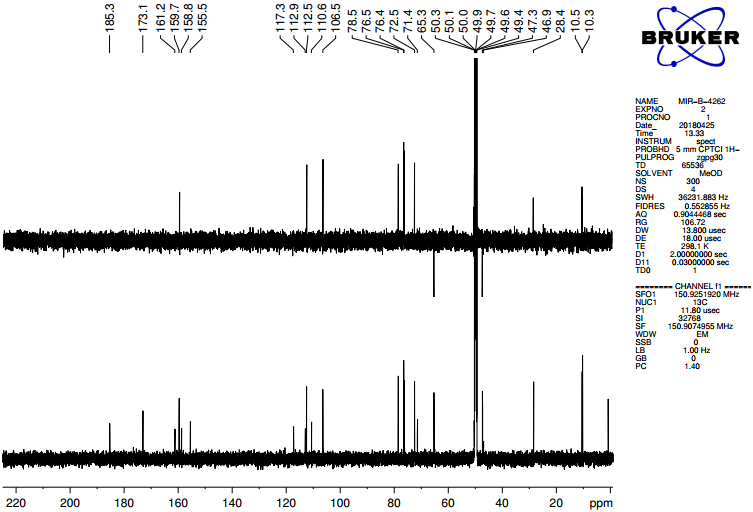
Figure S22. DEPT spectrum of matteuinterin B (**2**) in CD3OD


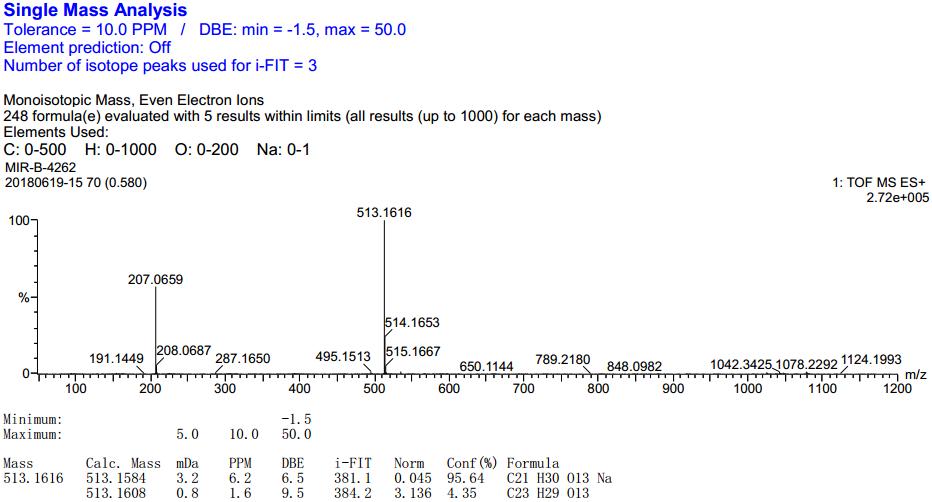
Figure S23. HRESIMS spectrum of matteuinterin B (**2**)


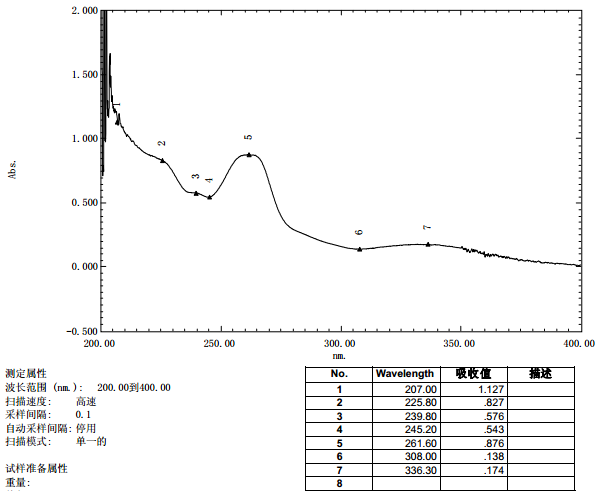
Figure S24. UV spectrum of matteuinterin B (**2**)


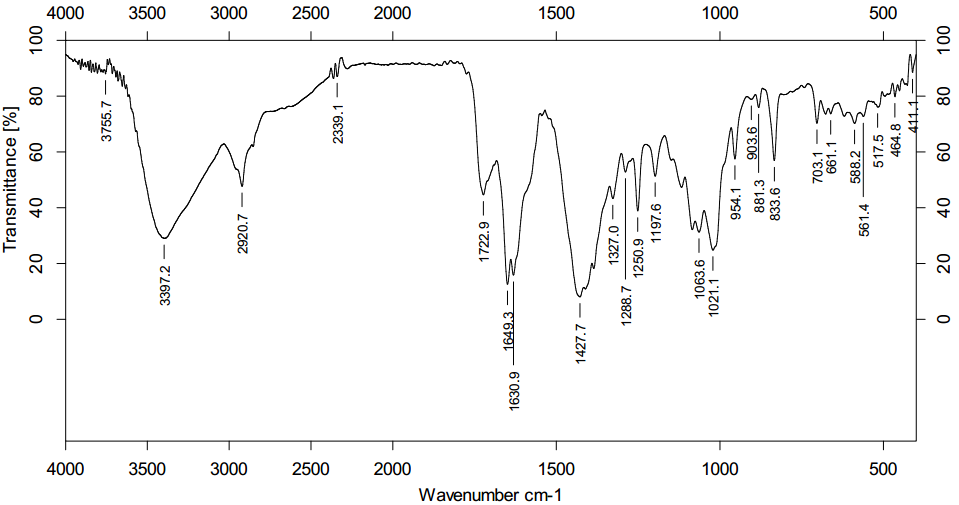
Figure S25. IR spectrum of matteuinterin B (**2**)


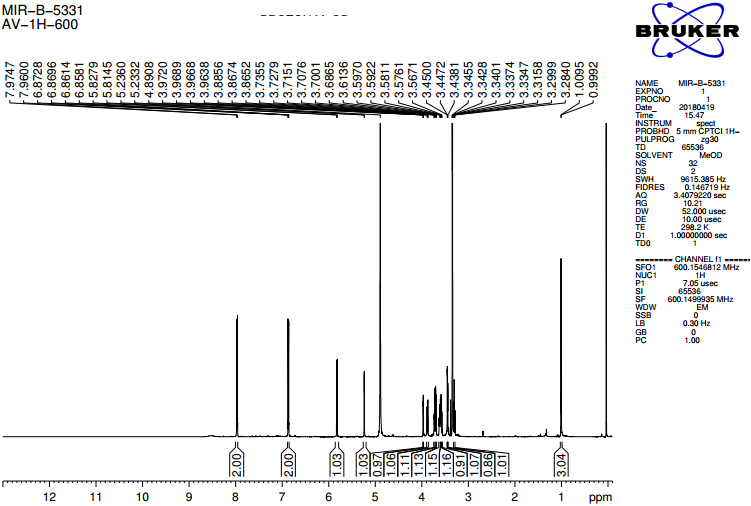
Figure S26. 1H NMR spectrum of matteuinterin C (**3**) in CD3OD


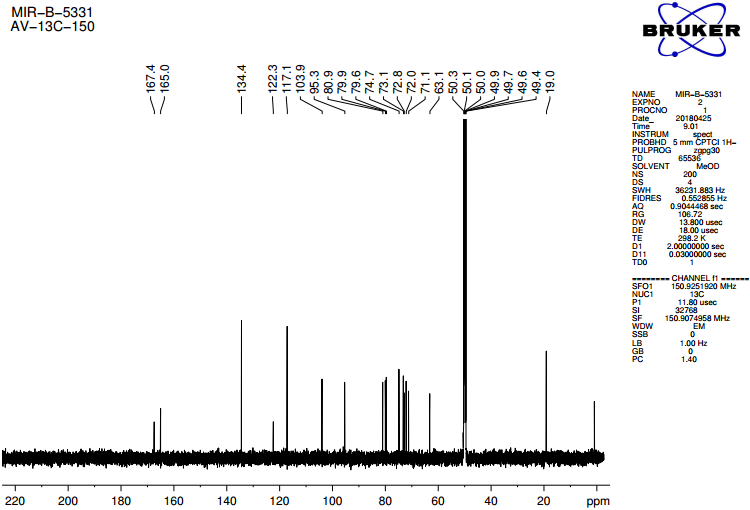
Figure S27. 13C NMR spectrum of matteuinterin C (**3**) in CD3OD


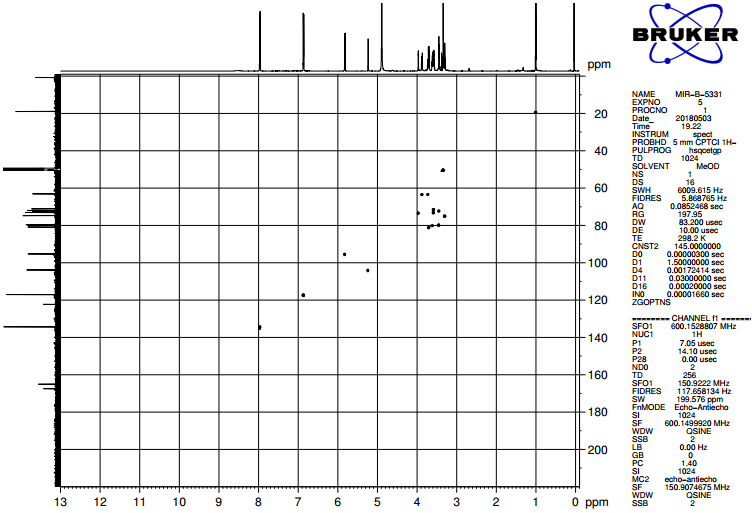
Figure S28. HSQC spectrum of matteuinterin C (**3**) in CD3OD


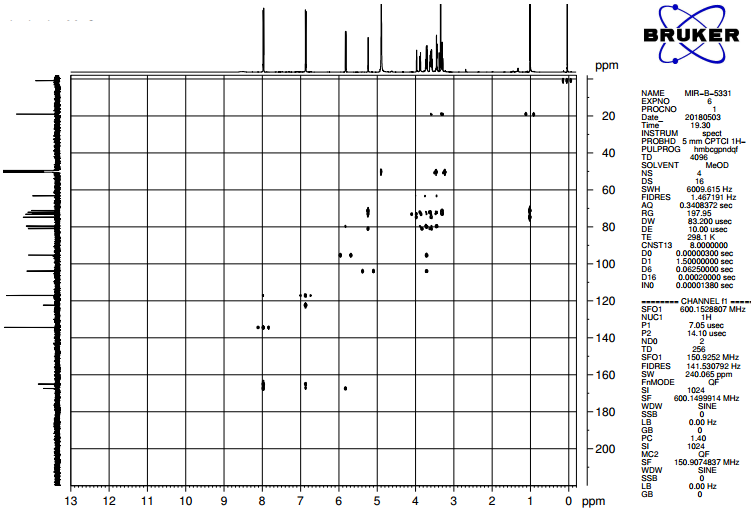
Figure S29. HMBC spectrum of matteuinterin C (**3**) in CD3OD


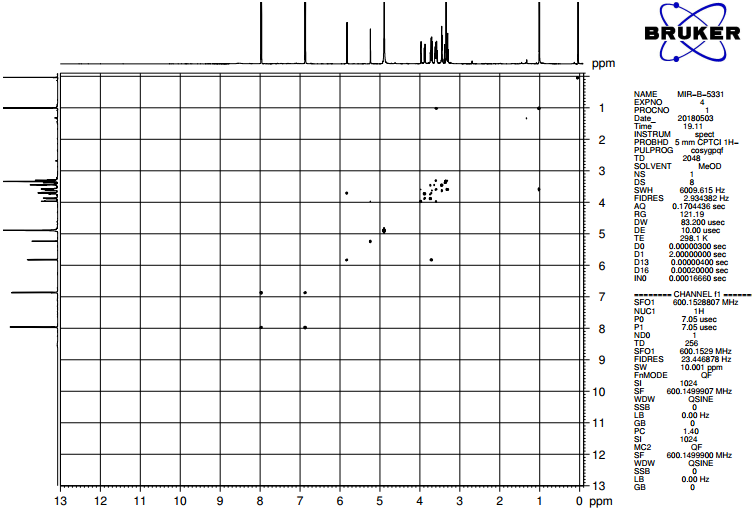
Figure S30. COSY spectrum of matteuinterin C (**3**) in CD3OD


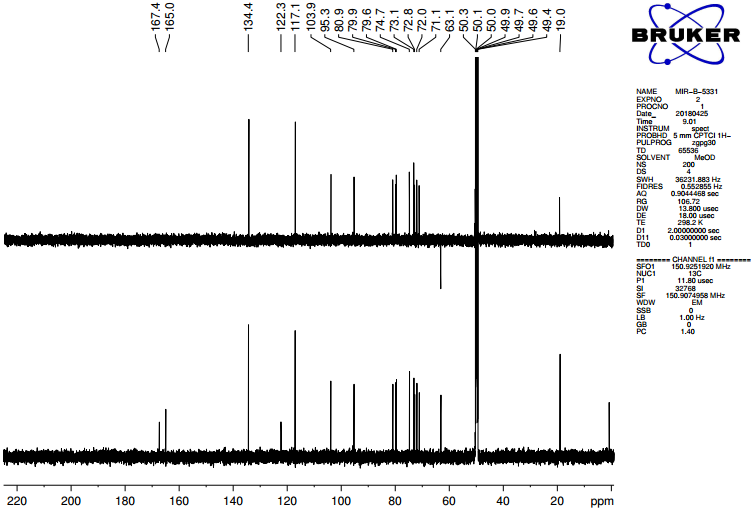
Figure S31. DEPT spectrum of matteuinterin C (**3**) in CD3OD


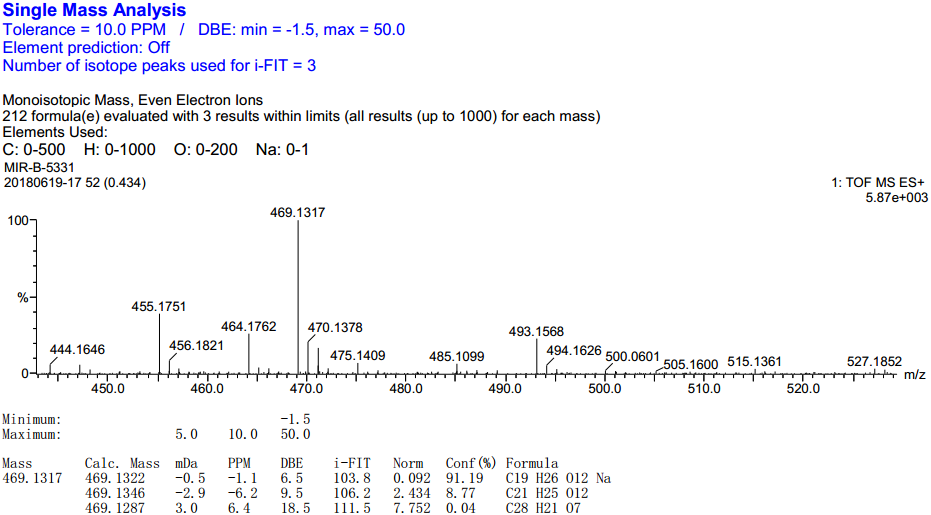


Figure S32. HRESIMS spectrum of matteuinterin C (**3**)


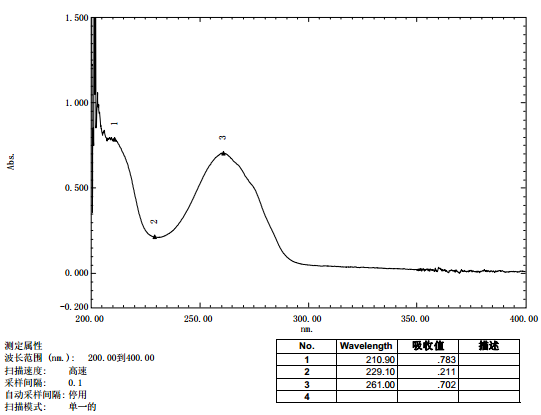


Figure S33. UV spectrum of matteuinterin C (**3**)


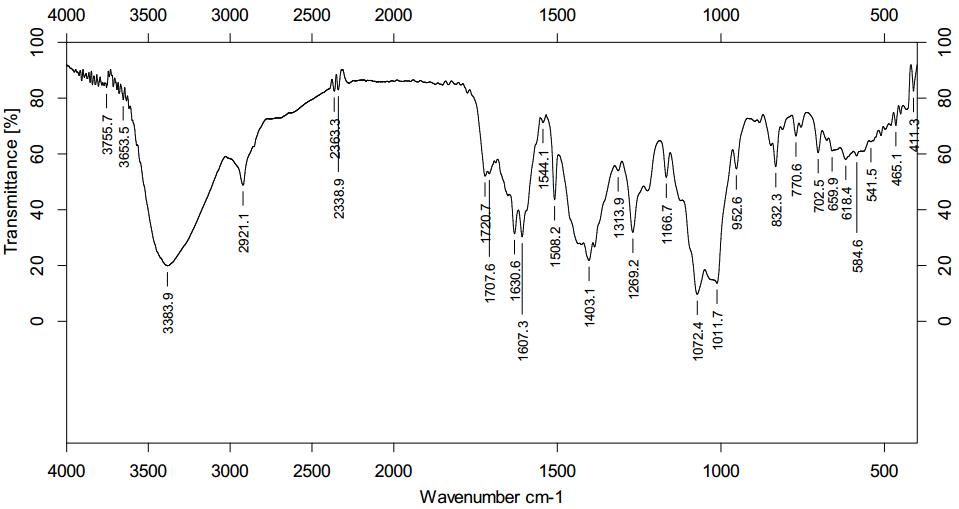


Figure S34. IR spectrum of matteuinterin C (**3**)

Scheme S1 Determination of the absolute configuration of HMG group in matteuinterins C (**2**). Reagents and conditions: (a) (*S*)-1-phenylethylamine, PyBOP, HOBt, Et3N, DMF; (b) LiBH4, THF; (c) Ac2O, pyridine.


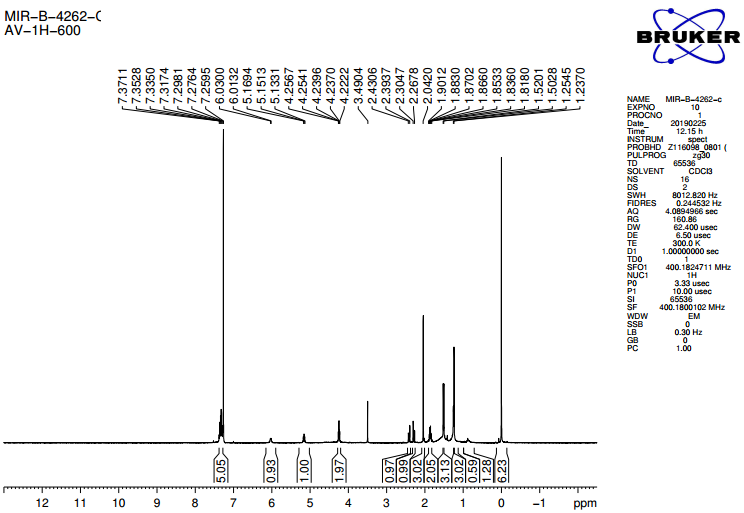


Figure S35. 1H NMR spectra of compound **2C** in CD3Cl.
